# Supplementary material for: Malacological Survey and Spatial Distribution of Intermediate Host Snails in Schistosomiasis Endemic Districts of Rwanda
Source: MDPI journal article supplement (doi:10.3390/tropicalmed8060295), 2023-05-28
Supplement: s1 [file s1]

Morphologically , snail species cercariae were observed under the microscope and were found to have differing characteristics. The Furcocercous cercaria from *Bulinus* spp and Gymnocephalous cercaria from *Biomphalaria*. spp(2).

Their shapes are illustrated below- Figure S2.(a and b)

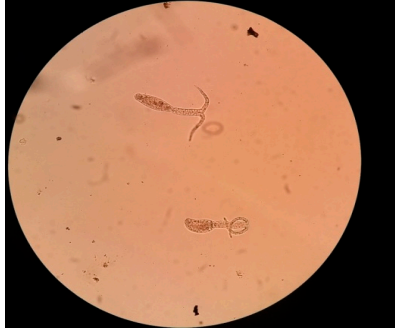

Figure S2.a showing the Furcocercous cercaria from *Bulinus* spp

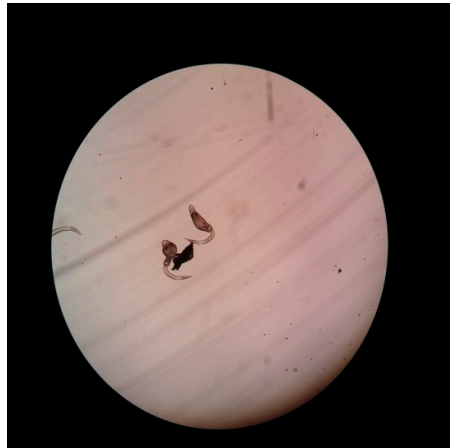

Figure S2.b showing the Gymnocephalous cercaria from *Biomphalaria* spp.
