# Supplementary material for: Malacological Survey and Spatial Distribution of Intermediate Host Snails in Schistosomiasis Endemic Districts of Rwanda
Source: MDPI journal article supplement (doi:10.3390/tropicalmed8060295), 2023-05-28

**Figure.S3.**howing the *B.truncatus* species that were collected along the wetland (rice paddies and along the lakeshores in Rwanda

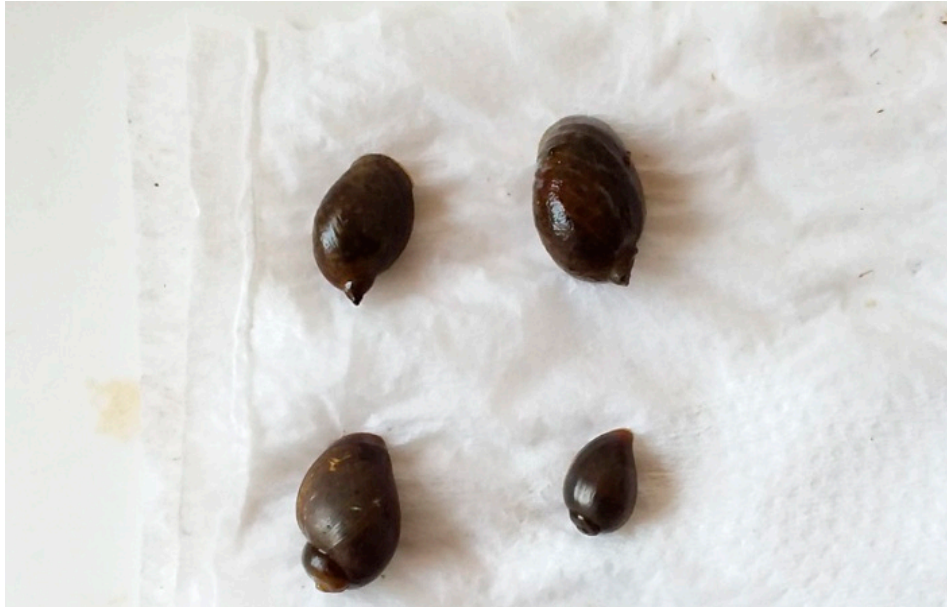

Supplement: s1 [file s1]
