# Supplementary material for: Malacological Survey and Spatial Distribution of Intermediate Host Snails in Schistosomiasis Endemic Districts of Rwanda
Source: MDPI journal article supplement (doi:10.3390/tropicalmed8060295), 2023-05-28
Supplement: s1 [file s1]

**Table S1: Snail abundance from the surveyed districts**

| DISTRICT   | BULINUS | BIOMPHALARIA | TOTAL |
|------------|---------|--------------|-------|
| Bugesera   | 241     | 27           | 268   |
| Gasabo     | 92      | 28           | 120   |
| Gatsibo    | 158     | 248          | 406   |
| Gicumbi    | 301     | 77           | 378   |
| Gisagara   | 352     | 104          | 456   |
| Kamonyi    | 91      | 0            | 91    |
| Karongi    | 0       | 0            | 0     |
| Kayonza    | 123     | 94           | 217   |
| Musanze    | 257     | 0            | 257   |
| Ngoma      | 123     | 17           | 140   |
| Nyagatare  | 716     | 294          | 1010  |
| Nyamasheke | 364     | 179          | 543   |
| Nyanza     | 271     | 46           | 317   |
| Rusizi     | 486     | 293          | 779   |
| Rwamagana  | 78      | 42           | 120   |
| Total      | 3653    | 1449         | 5102  |
