# Supplementary material for: Malacological Survey and Spatial Distribution of Intermediate Host Snails in Schistosomiasis Endemic Districts of Rwanda
Source: MDPI journal article supplement (doi:10.3390/tropicalmed8060295), 2023-05-28

**Figure S1: Spatial distribution of snails by species from the endemic areas, coloured by abundancies.**

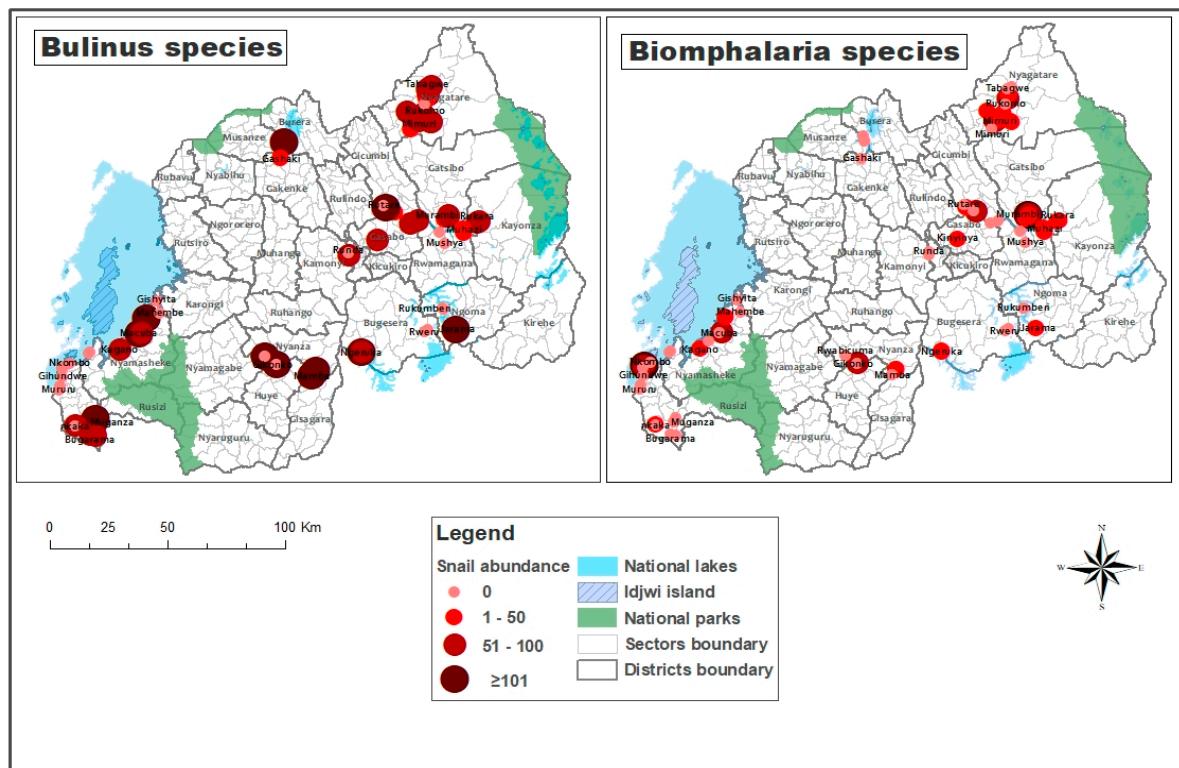

Supplement: s1 [file s1]
